# Supplementary material for: Attachment of poly(acrylic acid) to 3-aminopropyltriethoxysilane surface-modified hydroxyapatite
Source: Royal Society of Chemistry journal article supplement (doi:10.1039/c3tb21110j), 2013-01-01
Supplement: c3tb21110j.pdf [file c3tb21110j.pdf]

## SUPPLEMENTARY INFORMATION

### Methods

X-ray diffraction (XRD) patterns were recorded on a Bruker D8 Advance X-Ray diffractometer with a Cu K $\alpha$  anode ( $\lambda = 0.1542$  nm) operating at 40 kV and 30 mA. The diffraction patterns were collected at 25 °C and over an angular range of 20 to 70° with a step size of 0.05° per step and a dwell time of 12 s per increment. The obtained pattern was matched to stoichiometric HAP (JCPDS, card number 01-072-1243) from the Powder Diffraction File-2 database of the International Centre for Diffraction Data.

Specific surface area analysis of HAP was determined by nitrogen adsorption/desorption isotherms at -196°C on a Micromeritics Tristar II 3020 system. The samples were outgassed at 80 °C overnight before analysis was performed. Nitrogen was used as the adsorbate gas, and the BET isotherm was determined with the ratio of the gas pressure to the saturated vapour pressure  $z = P / P_0$  ranging from 0.1 to 0.35.

Transmission electron microscopy (TEM) was carried out on a JEOL 1010 TE microscope operating at an accelerating voltage of 100 kV. The specimens were prepared by taking 10 mg mL<sup>-1</sup> samples in water and evaporating them onto holey carbon coated copper grids.

### Results

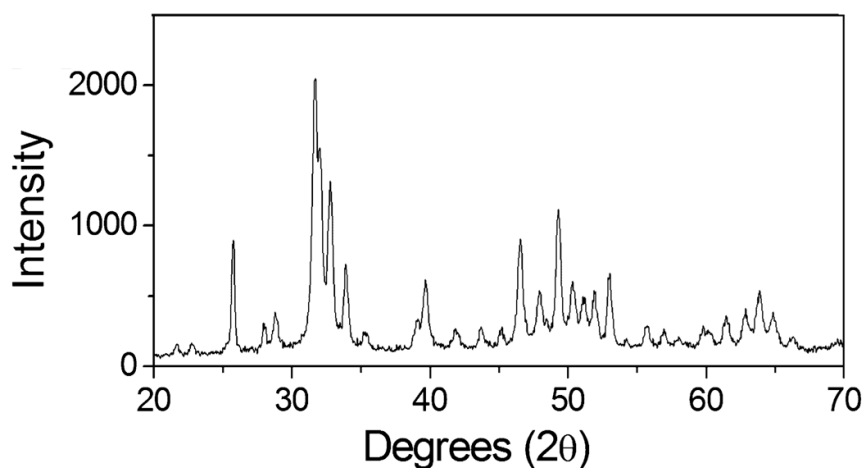

**Figure S1.** XRD pattern of synthesized HAP used for surface modification. This observed pattern matches that of the reference HAP synthesized in (Markovic, Fowler et al. 2004)

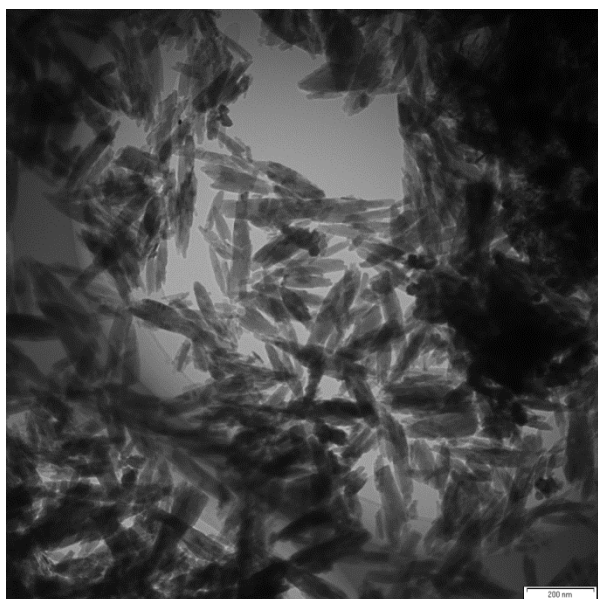

**Figure S2.** TEM image of HAP displaying the surface morphology and crystal size; the crystal lengths and widths ranged between 100-260 nm and 20-40 nm (scale bar is 200 nm) (see Table S1 for further details of crystal size)

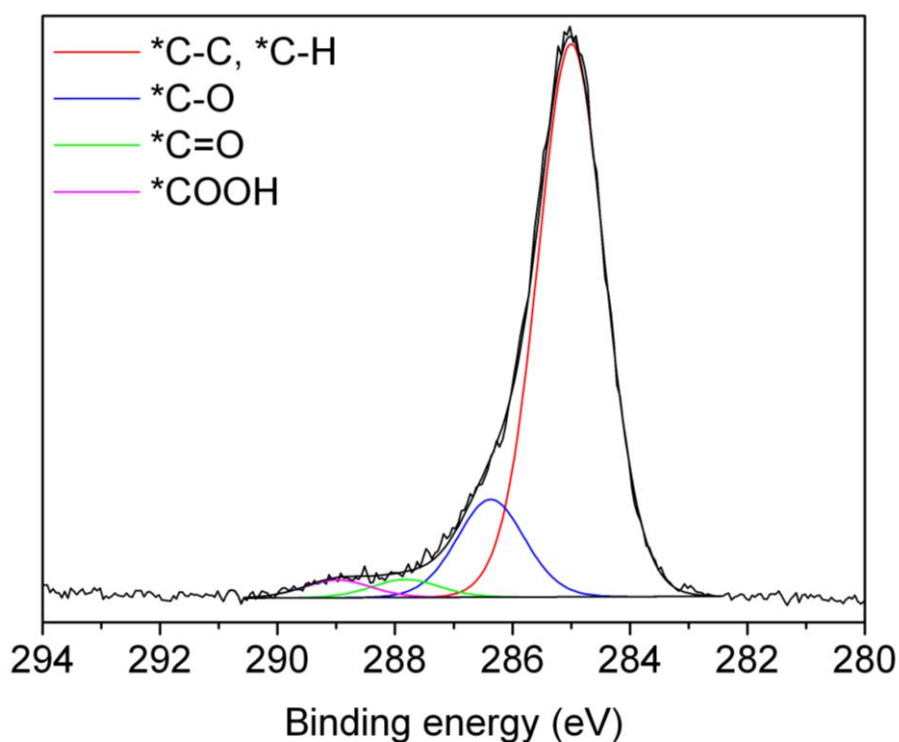

**Figure S3.** High resolution XPS spectrum of the C1s peak of HAP. The four fitted peaks appear at binding energies of 285.0 eV (\*C-C, \*C-H), \*C-O ( $286.5 \pm 0.2$  eV), \*C=O ( $288.0 \pm 0.2$  eV) and \*COOH ( $289.0 \pm 0.2$  eV) (Beamson and Briggs 1992). The ratio of the hydrocarbon peak (C-C, C-H) to the cumulative oxidized carbon peaks (\*C-O, \*C=O and \*COOH) is 0.2. This is in the range found for adventitious carbon in most literature. (Barr and Seal 1995)

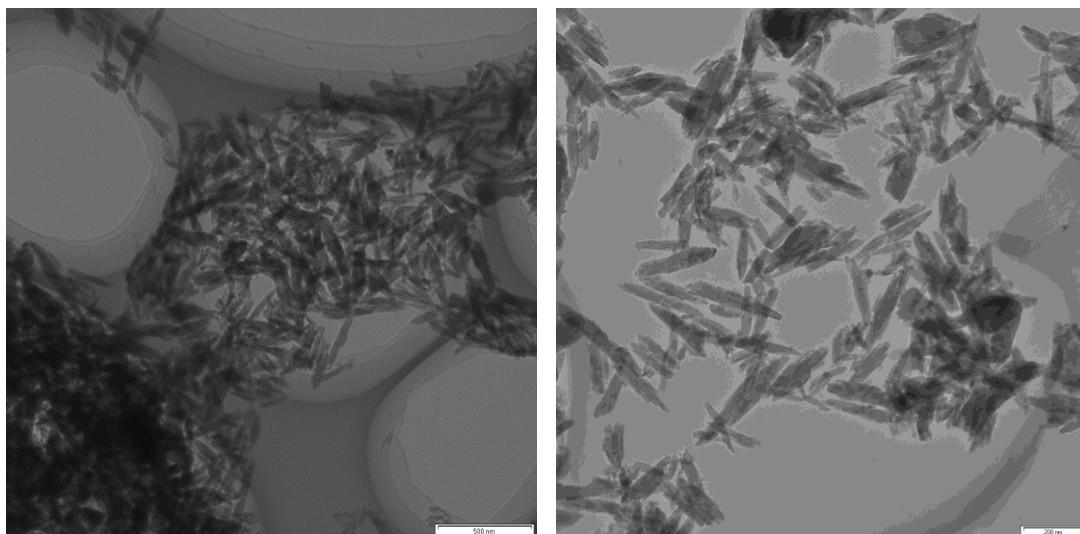

**Figure S4.** TEM image of samples A-HAP-3 (left, scale bar 500 nm) and A-HAP-3-150 (right, scale bar 200 nm) illustrating that only HAP crystals can be observed thereby confirming that separate silica particles do not form in the reaction.

**Table S1.** Lengths and widths of crystals from TEM

| Sample              | Length (nm)  | Width (nm)  |
|---------------------|--------------|-------------|
| HAP                 | $180 \pm 80$ | $30 \pm 10$ |
| A-HAP-3-150         | $200 \pm 60$ | $30 \pm 10$ |
| PAA-HAP             | $170 \pm 50$ | $20 \pm 10$ |
| PAA-A-HAP-150       | $160 \pm 60$ | $30 \pm 10$ |
| PAA-A-HAP-200       | $160 \pm 60$ | $30 \pm 10$ |
| PAA-A-HAP-200-ionic | $170 \pm 60$ | $30 \pm 10$ |

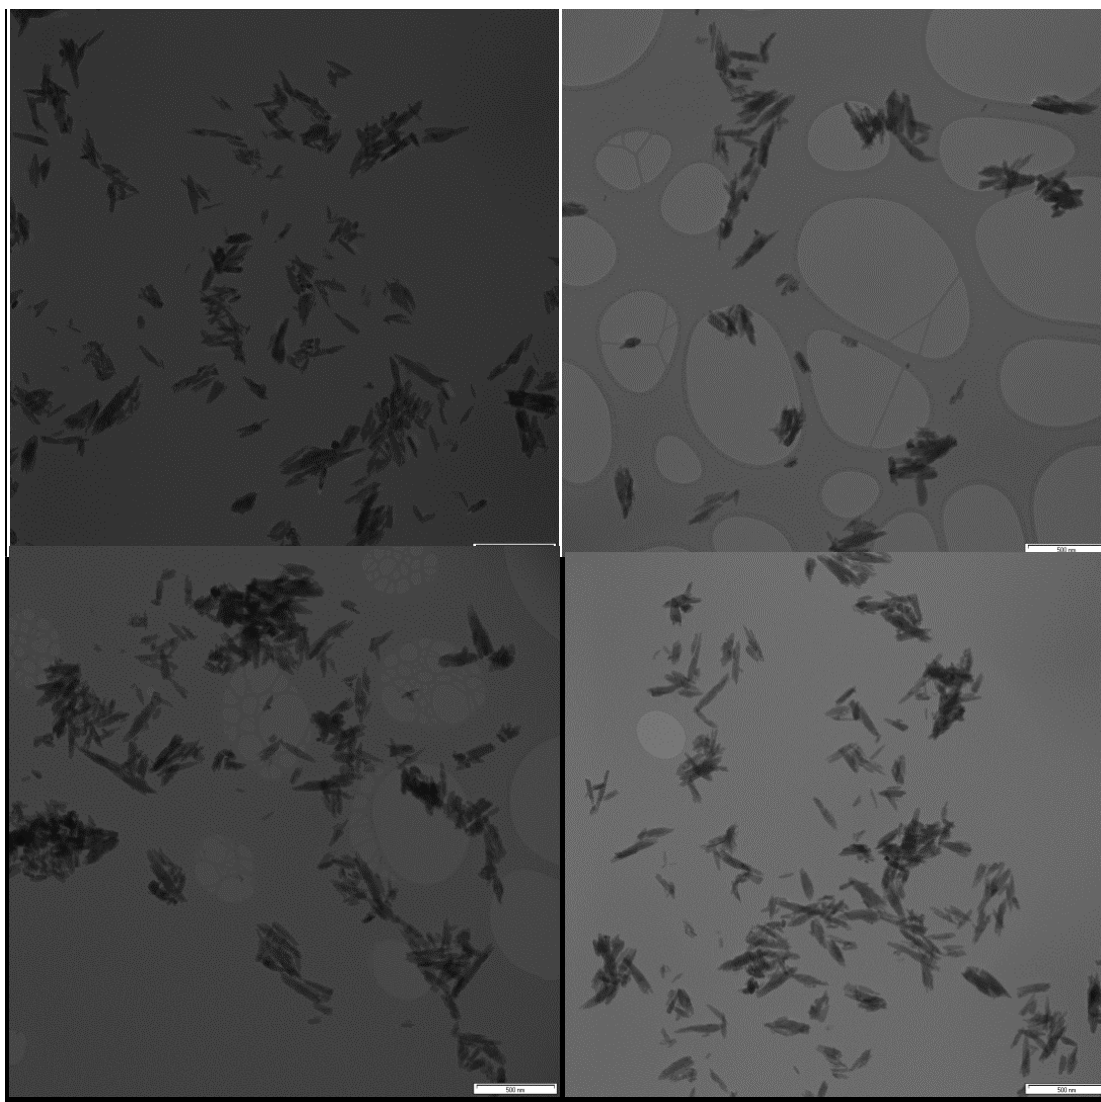

**Figure S5.** TEM images of PAA-HAP (top left), PAA-A-HAP-150 (top right), PAA-A-HAP-200 (bottom left) and PAA-A-HAP-200-ionic (bottom right) (scale bar in all images is 500 nm)

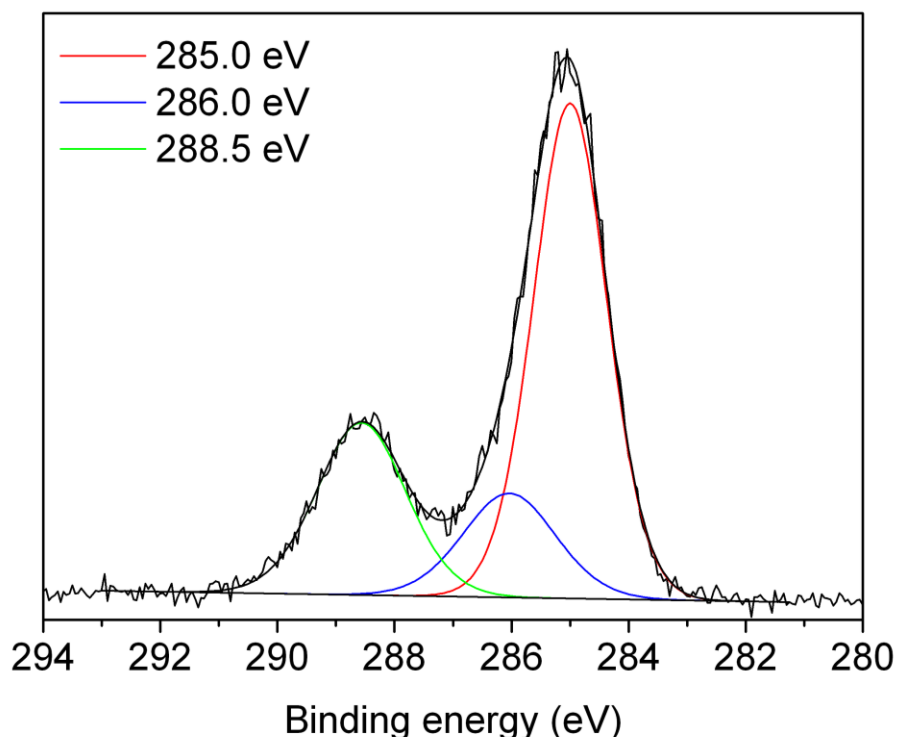

**Figure S6.** XPS C 1s narrow scan of PAA-A-HAP-150 with curve fit. The peak at 285.0 eV corresponds to \*C-C,\*C-H, \*C-Si and \*C-C=O, the peak at 286.0 eV to \*C-N and \*C-O, and the peak at 288.5 eV to N-\*C=O, \*COOH/\*COO<sup>-</sup> and CO<sub>3</sub><sup>2-</sup>. These positions for the curve fitted peaks are based on published values of \*C-C,\*C-H (285.0 eV), \*C-Si (284.4±0.2 eV), \*C-C=O (285.5±0.2 eV), \*C-N (286.0±0.2 eV), \*C-O (286.5±0.2 eV), N-\*C=O (288.2±0.2 eV), \*COOH (289.0±0.2 eV) and CO<sub>3</sub><sup>2-</sup> (290.3±0.2 eV).(Beamson and Briggs 1992, Ratner and Castner 2009)

#### References:

Barr, T. L. and S. Seal (1995). "Nature of the use of adventitious carbon as a binding energy standard." *Journal of Vacuum Science & Technology A: Vacuum, Surfaces, and Films* **13**(3): 1239-1246.

Beamson, G. and D. Briggs (1992). *High Resolution XPS of Organic Polymers: The Scienta ESCA300 Database*, John Wiley and Sons.

Markovic, M., B. O. Fowler and M. S. Tung (2004). "Preparation and Comprehensive Characterization of a Calcium Hydroxyapatite Reference Material." *Journal of Research of the National Institute of Standards and Technology* **109**(6): 553-553-568.

Ratner, B. D. and D. G. Castner (2009). *Electron Spectroscopy for Chemical Analysis. Surface Analysis – The Principal Techniques*. J. C. Vickerman and I. S. Gilmore, John Wiley & Sons, Ltd: 47-112.
